# Supplementary material for: Timely care for frail older people referred to hospital improves efficiency and reduces mortality without the need for extra resources
Source: Oxford University Press journal article supplement (doi:10.1093/ageing/aft170), 2013-11-12
Supplement: aft170_Supplementary_Data.zip [file aft170_Supplementary_Data.zip]

Archive with 16 entries (16 files):
- aft170supp_fig9av.pdf
- aft170supp_fig7i.pdf
- aft170supp_fig9aiv.pdf
- aft170supp_fig9bii.pdf
- aft170supp.docx
- aft170supp_fig5.pdf
- aft170supp_fig9biii.pdf
- aft170supp_fig7ii.pdf
- aft170supp_fig9aiii.pdf
- aft170supp_fig8.pdf
- aft170supp_fig9aii.pdf
- aft170supp_fig4.pdf
- aft170supp_fig9bi.pdf
- aft170supp_fig9ai.pdf
- aft170supp_fig9avi.pdf
- aft170supp_fig6.pdf
