# Supplementary material for: Timely care for frail older people referred to hospital improves efficiency and reduces mortality without the need for extra resources
Source: Oxford University Press journal article supplement (doi:10.1093/ageing/aft170), 2013-11-12
Supplement: aft170_Supplementary_Data.zip [file aft170_Supplementary_Data.zip › aft170supp.docx]

**Supplementary Data**

1. **Establishment of the Frailty Unit**

During the tests of change, we identified that the multidisciplinary team (MDT) which is comprised of junior doctor, consultant geriatrician, nurses, pharmacists and occupational or physiotherapists spent a proportion of their time walking between one of five locations where the patient could be situated. Fitting the consultants with pedometers revealed that on average they were walking about 1,000 paces per hour. There is no reason to believe that this was not the case for the other team members. It also became apparent that decision making was improved when the team were together with the patient. This led us to postulate that co-locating all our patients into a single location would remove the wastes associated with the dispersed locations and would lead to more timely and appropriate staff interactions. This then led to the requirement of a single physical unit.

**Costs associated with the work**

As the unit was created by a realignment of existing human and physical resources there was no net cost to its creation. The consultant job plans were similarly changed by realigning existing activities with no net increase in costs. The only costs associated with the changes were those required for the improvement effort. These costs fall into two broad categories; the technical service improvement support and facilitation and the cost of staff time to attend the weekly improvement meetings. The service improvement support came from 3 sources; a consultant geriatrician (TD) with extended training in service improvement, a member of the service improvement team (SPH) and an external consultant (KS) who was funded externally. All three individuals had other roles during this time so our best estimation of cost would be around £75-80,000 pa. The improvement meetings had variable attendance rates but typically around 15 members of staff attended for 1 hour per week. The cost of this is likely to be around £20,000 p.a.

1. **Statistical analyses of the three outcome variables**

Portmanteau tests for white noise

| Variable | Q statistic (32 degrees of freedom) | p-value | Comment |
| --- | --- | --- | --- |
| Average bed occupancy | 198.2240 | <0.0001 | Not consistent with white noise |
| Proportion died | 26.6525 | 0.734 | Consistent with white noise |
| Readmission rate | 30.2069 | 0.558 | Consistent with white noise |

Statistical model results ( ) are 95% confidence intervals.

|  | **Average bed occupancy (monthly)** | | **Proportion Died (monthly)** | | **Proportion readmitted (monthly)** | |
| --- | --- | --- | --- | --- | --- | --- |
| Statistical model | Prais-Winsten regression model | | Logistic regression model | | Logistic regression model | |
| Variable | Coefficient | p-value | Odds Ratio | p-value | Odds Ratio | p-value |
| Sequence (1 to 69) | -.137  (-.622 to .349) | 0.576 | 1.004  (.998 to 1.009) | 0.219 | 1.000  (.995 to 1.005) | 0.956 |
| Intervention period | -20.4  (-39.59 to 1.23) | 0.037 | .785  (.612 to 1.006) | 0.056 | .943  (.751 to 1.184) | 0.611 |
| Constant | 303.56  (288.01 to 319.11) | <0.001 | .113  (.095 to .134) | <0.001 | .205  (.176 to .238) | <0.001 |
| rho | .648 |  | Not applicable |  | Not applicable |  |

1. **Time Series Statistical Analysis - Run Charts and Statistical Process Charts.**

Our time series analysis typically uses 2 different charts:

- 1. **Run charts** are consecutive points with the central tendency shown using the median. Various rules exist in order to decide whether or not the data pattern is exhibiting abnormal changes. These rules include a shift of 6 or more consecutive points to one side of het median or the other, a rising or falling trend of 5 or more consecutive points, too many or too few runs calculated against a table of expected ranges; or an abnormally high or low value (ref; The Data Guide by L. Provost and S. Murray, Austin, Texas, November, 2008: p3-11). Data which is dependent (such as bed occupancy) is shown using run charts.
  2. **Statistical process control charts** similarly plot data as a time series but describe the central tendency using the mean and a value of the data variation expressed usually as 3 sigma either side of the mean. A number of rules are employed to test if the data is being produced by a process that is exhibiting statistical control. An explanation of these rules can be found in Quality Improvement, Practical Applications for Medical Group Practice, D Balestracci and J Barlow, Chapter 7).

1. **Run chart showing Midnight Bed Occupancy for the GM Department: April 2009 - March 2012**

This shows that the seasonal component to the data does not explain the results achieved.

1. **Run chart showing Chest Medicine Bed Occupancy: Jan – Sept 2012**

This does not show the same fall in bed occupancy as was seen in the GM Department over the same period.

1. **SPC chart showing Re-Admission Rate to GM Department: May 2011 – Sept 2012**

This chart supports our contention that we did not increase our readmissions by earlier discharge.

1. **SPC chart showing time elapsed between patient arrival and Specialty review, prior to reconfiguration of consultant job plan (post-take ward round). Mean = 1171 minutes**

This chart was the baseline analysis of the lag between patient arrival in hospital and the time that they were seen by the specialty consultant.

**SPC chart showing time elapsed between patient arrival and Specialty review, after reconfiguration of consultant job plan (on-take pattern). Mean = 515 minutes.**

This chart shows the results of the initial multiple cycles of the test.

1. **SPC chart showing non-elective admissions to GM Department: Jan – Sept 2012**

No change in demand for beds is demonstrated.

1. **Our initial diagnostic analysis**
   1. **Demand**

**Number of patients by age group attending A&E/assessment units over time**

**Number of admissions by age group over time**

- 1. **Overall bed occupancy over time (daily), the bed occupancy by age group over time, and the bed occupancy of patients under the care of GSM over time.**
