# Supplementary figures and images for: Timely care for frail older people referred to hospital improves efficiency and reduces mortality without the need for extra resources
Source: Oxford University Press journal article supplement (doi:10.1093/ageing/aft170), 2013-11-12

## NEL Admissions All Specialties 65-84 yr old group

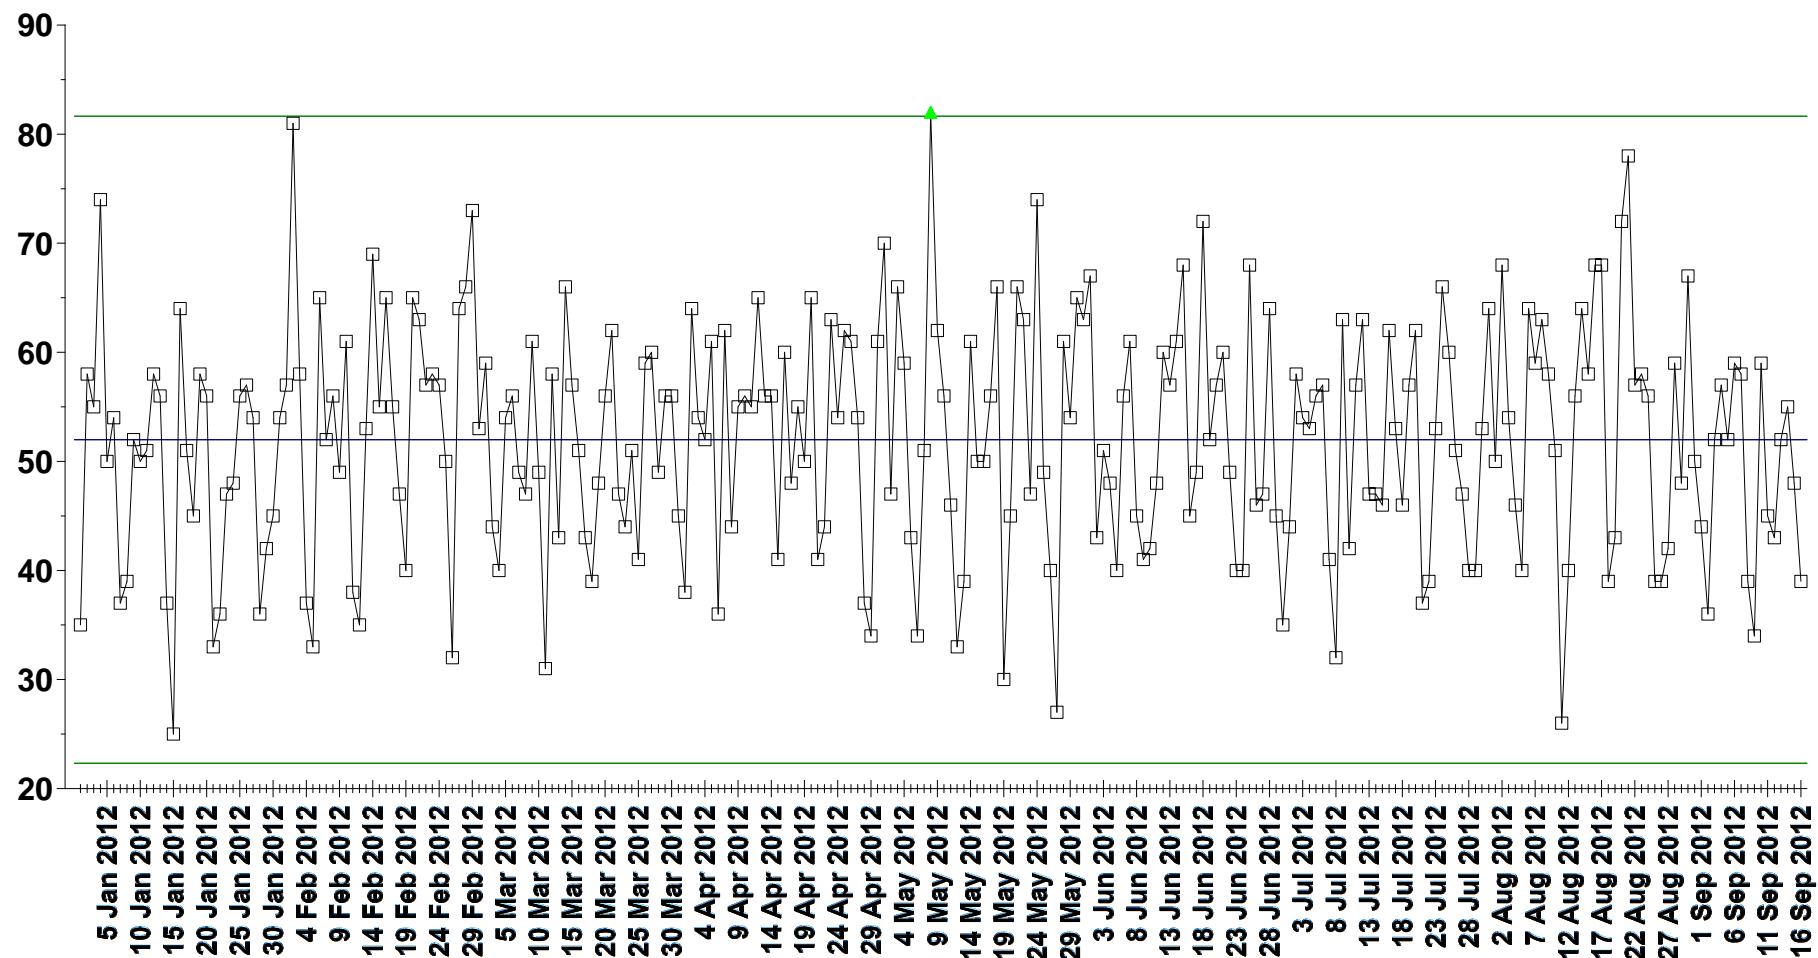

**Start** 1 Jan 2012  
**U.C.L.** =81.6  
**Mean** =52.0  
**L.C.L.** =22.3

Supplement: aft170_Supplementary_Data.zip [file aft170_Supplementary_Data.zip › aft170supp_fig9av.pdf]

## Time of Arrival to Specialty Review-Standard PTWR

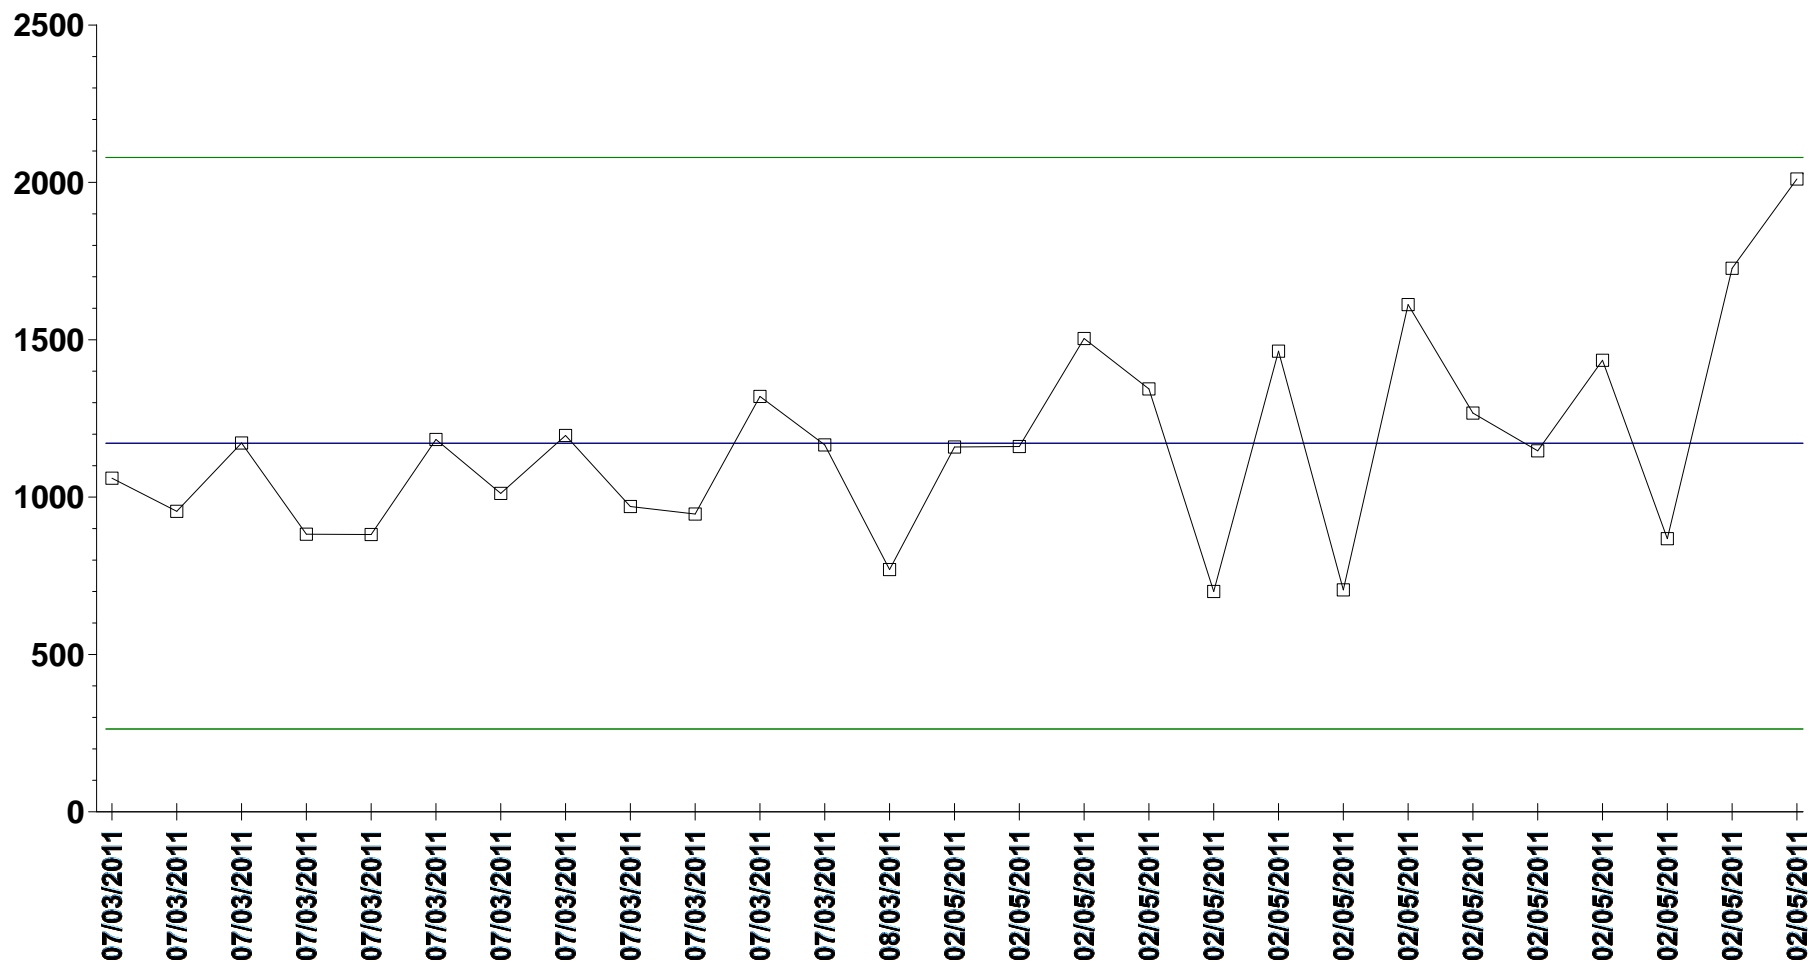

**Start** 07/03/2011  
**U.C.L.** =2079.0  
**Mean** =1171.0  
**L.C.L.** =263.0

Supplement: aft170_Supplementary_Data.zip [file aft170_Supplementary_Data.zip › aft170supp_fig7i.pdf]

## NEL Admissions All Specialties 16-64 yr old group

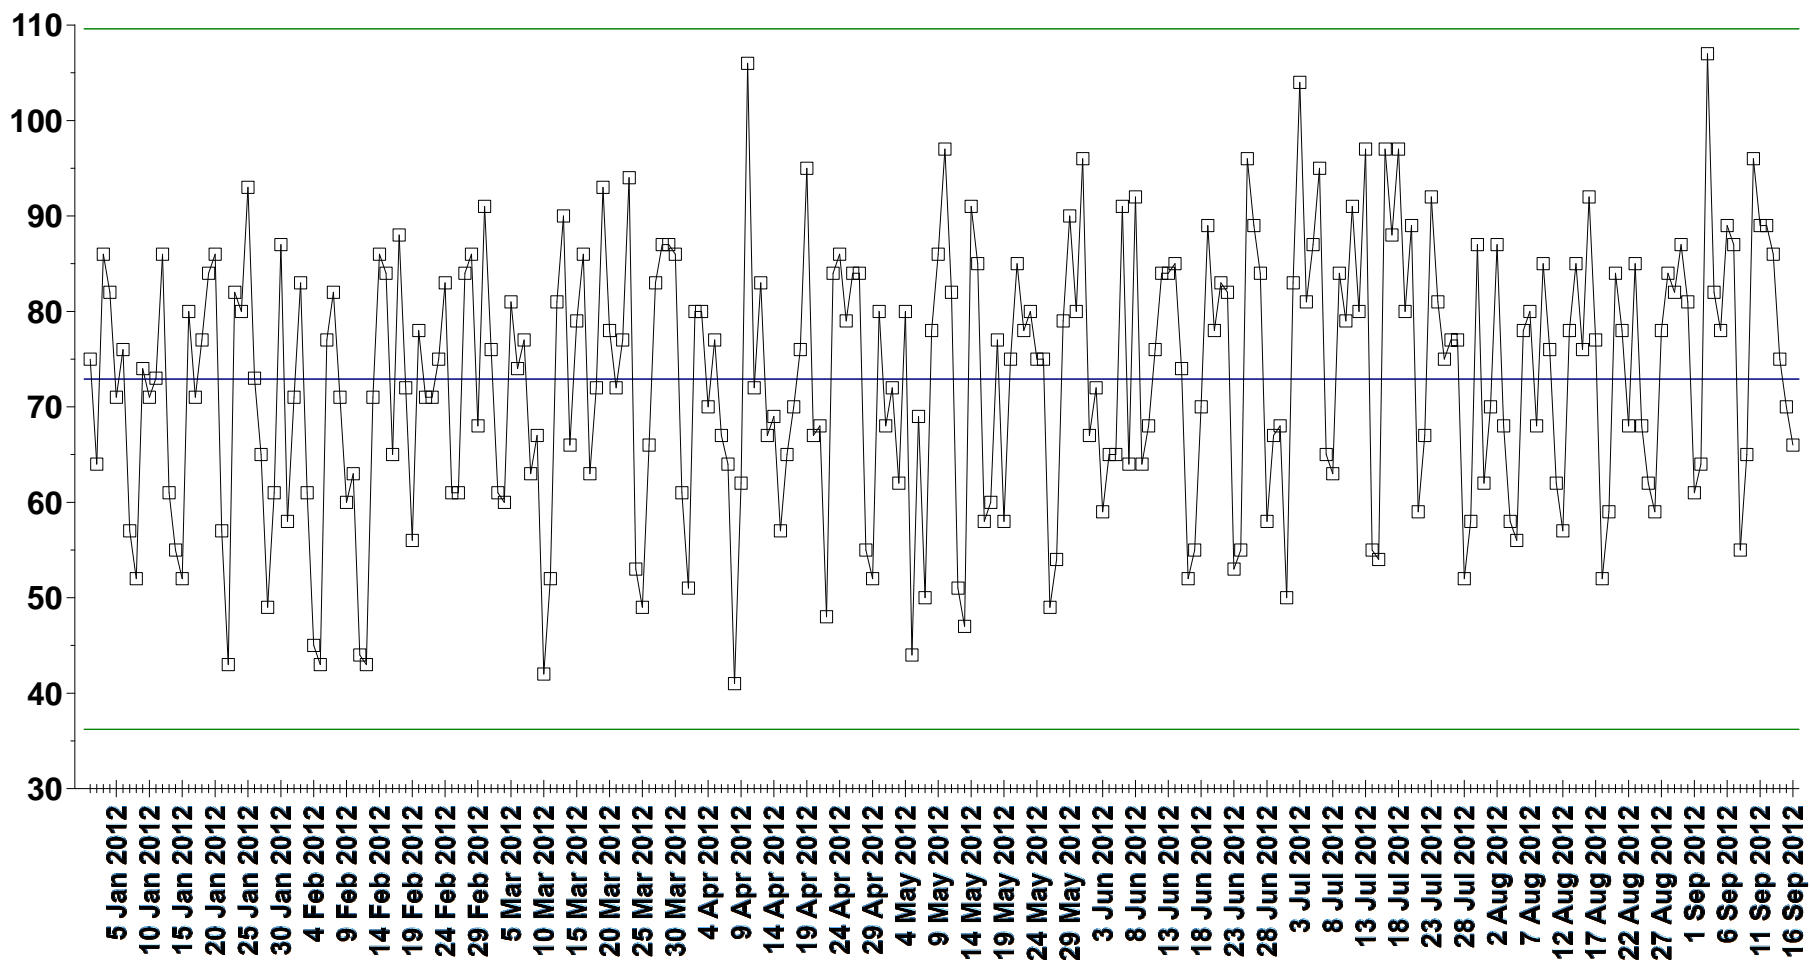

**Start**        1 Jan 2012  
**U.C.L.**       =109.6  
**Mean**        =72.9  
**L.C.L.**       =36.2

Supplement: aft170_Supplementary_Data.zip [file aft170_Supplementary_Data.zip › aft170supp_fig9aiv.pdf]

## Midnight Bed Occupancy NEL Admissions 65-84 yr old GSM

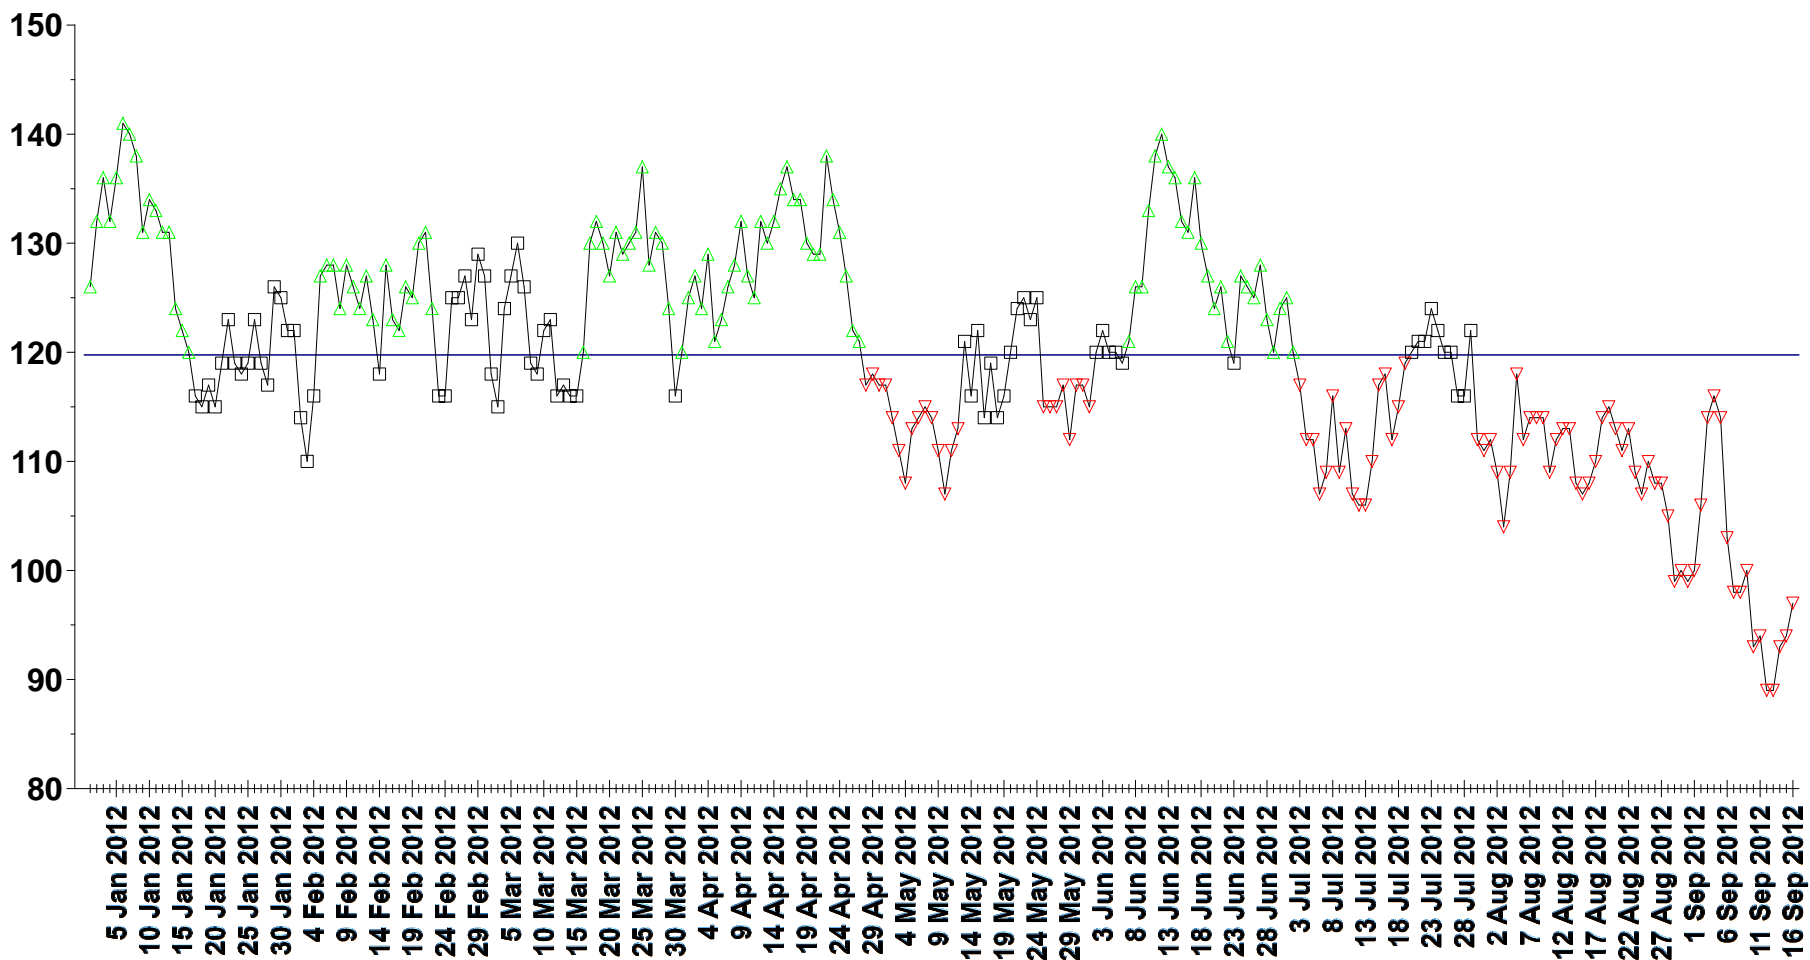

Start 1 Jan 2012

Mean =119.8

Supplement: aft170_Supplementary_Data.zip [file aft170_Supplementary_Data.zip › aft170supp_fig9bii.pdf]

# Chest Medicine NEL Midnight Bed Occupancy from 1/1/12 to 16/9/12

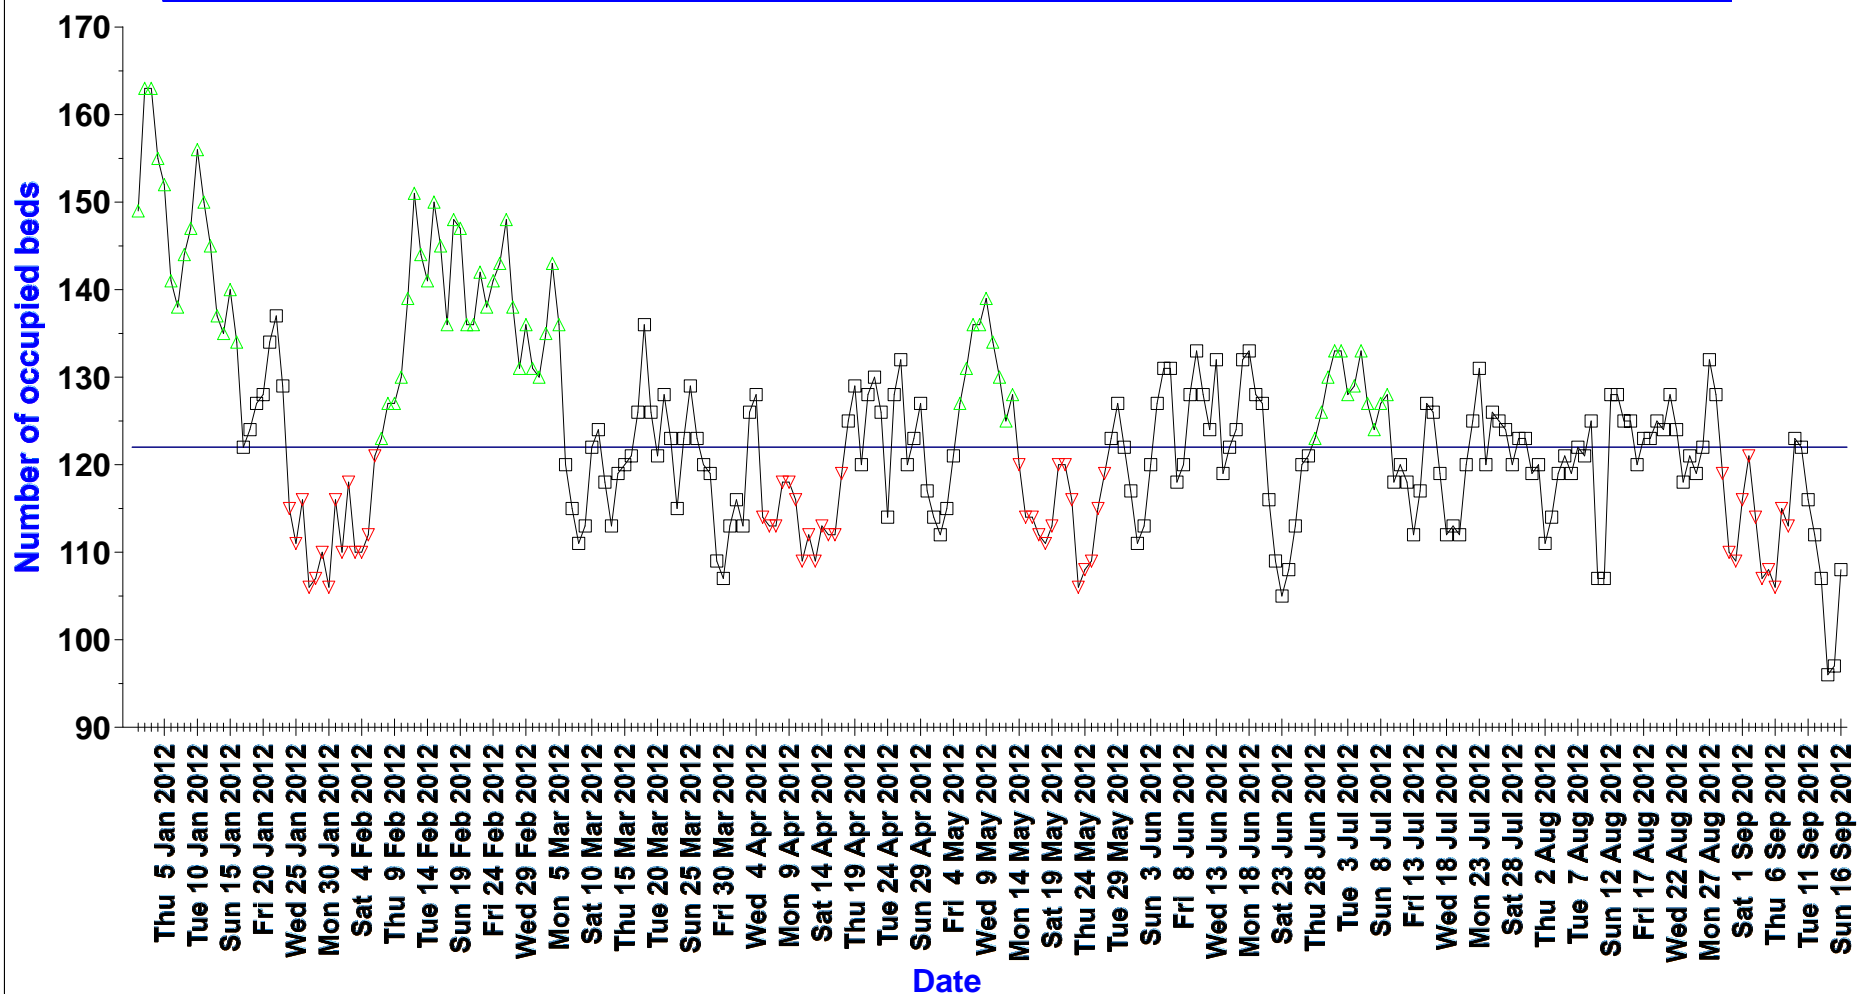

Start Sun 1 Jan 2012

Median =122.0

Supplement: aft170_Supplementary_Data.zip [file aft170_Supplementary_Data.zip › aft170supp_fig5.pdf]

## Midnight Bed Occupancy NEL Admissions 85+ yr old GSM

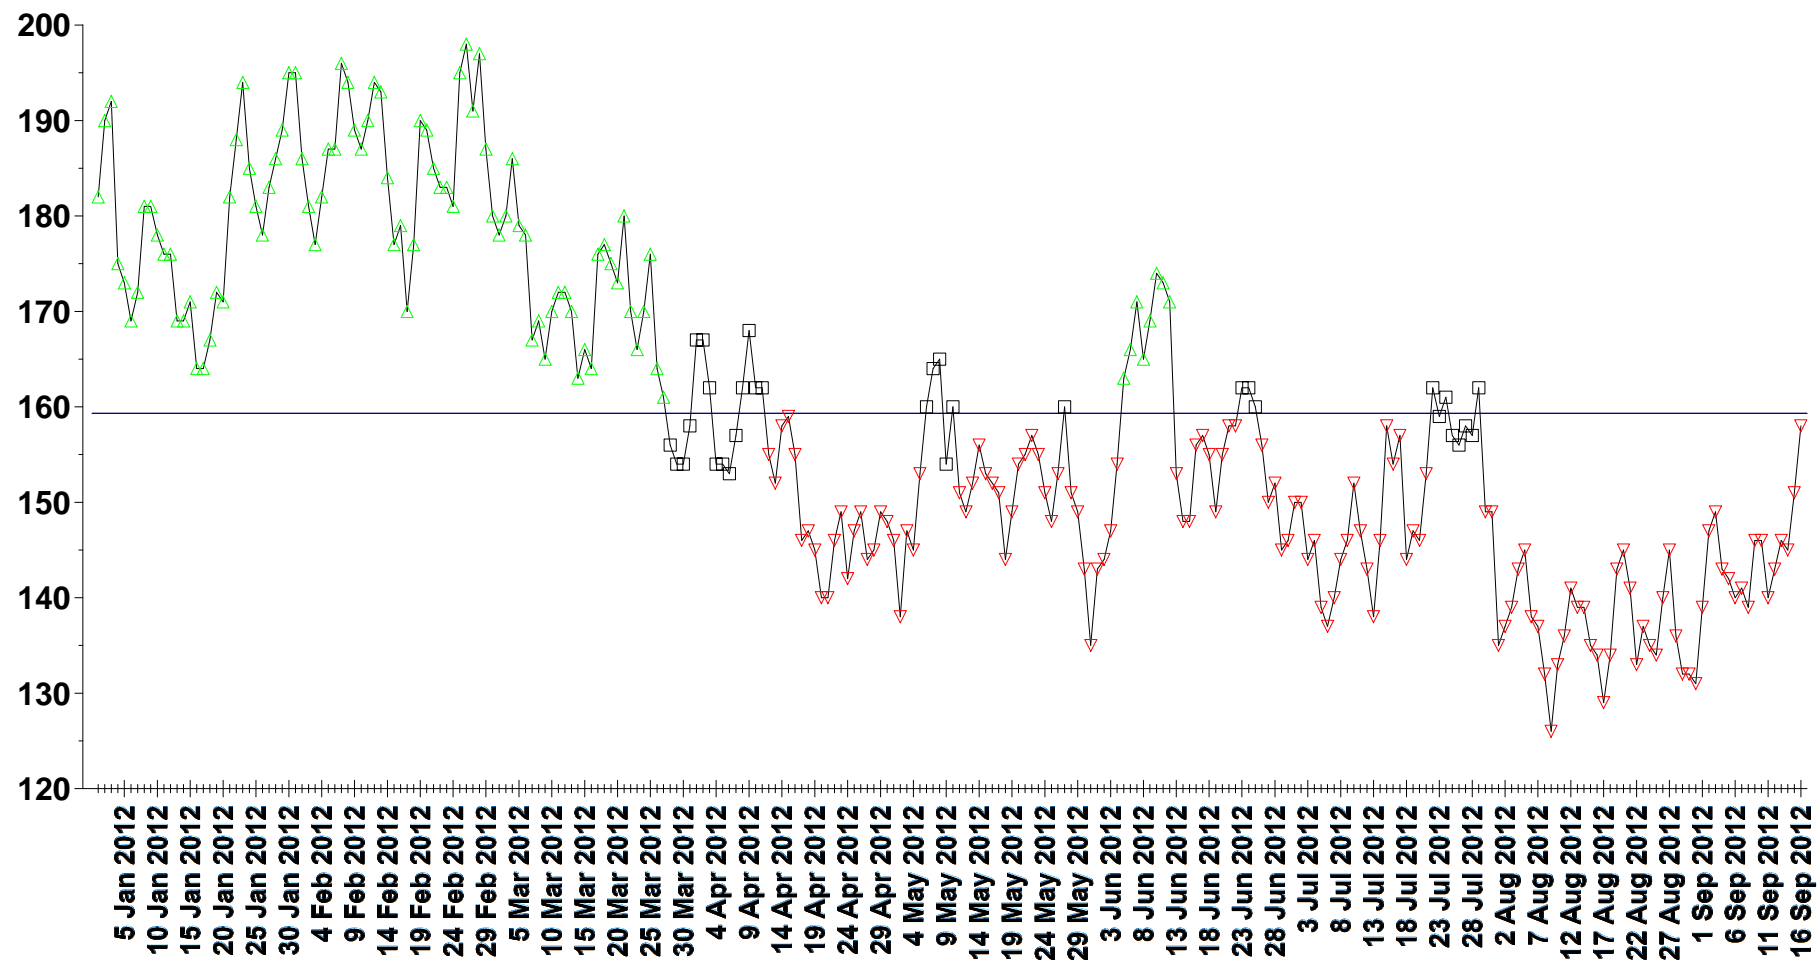

Start 1 Jan 2012

Mean =159.3

Supplement: aft170_Supplementary_Data.zip [file aft170_Supplementary_Data.zip › aft170supp_fig9biii.pdf]

# Time of Arrival to Specialty-On-day take PDSA cycles

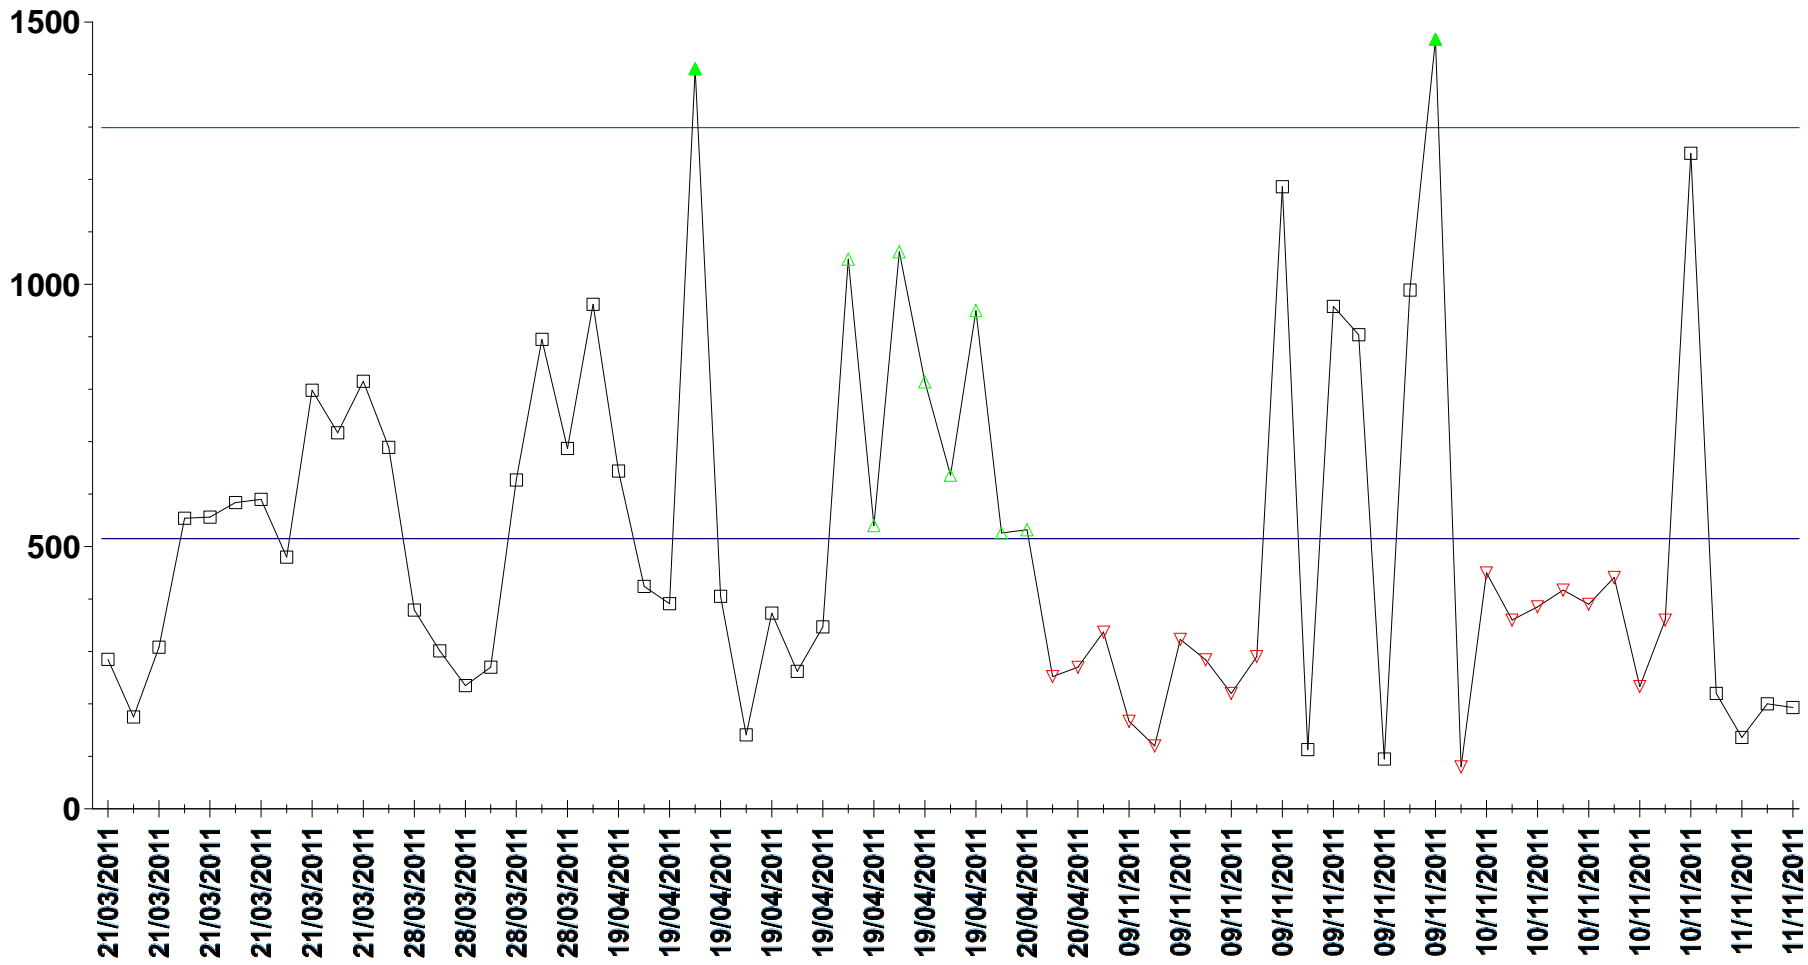

Start 21/03/2011  
U.C.L. =1298.6  
Mean =515.0  
L.C.L. =n/a

Supplement: aft170_Supplementary_Data.zip [file aft170_Supplementary_Data.zip › aft170supp_fig7ii.pdf]

## NEL Admission (FCE=1) to GSM

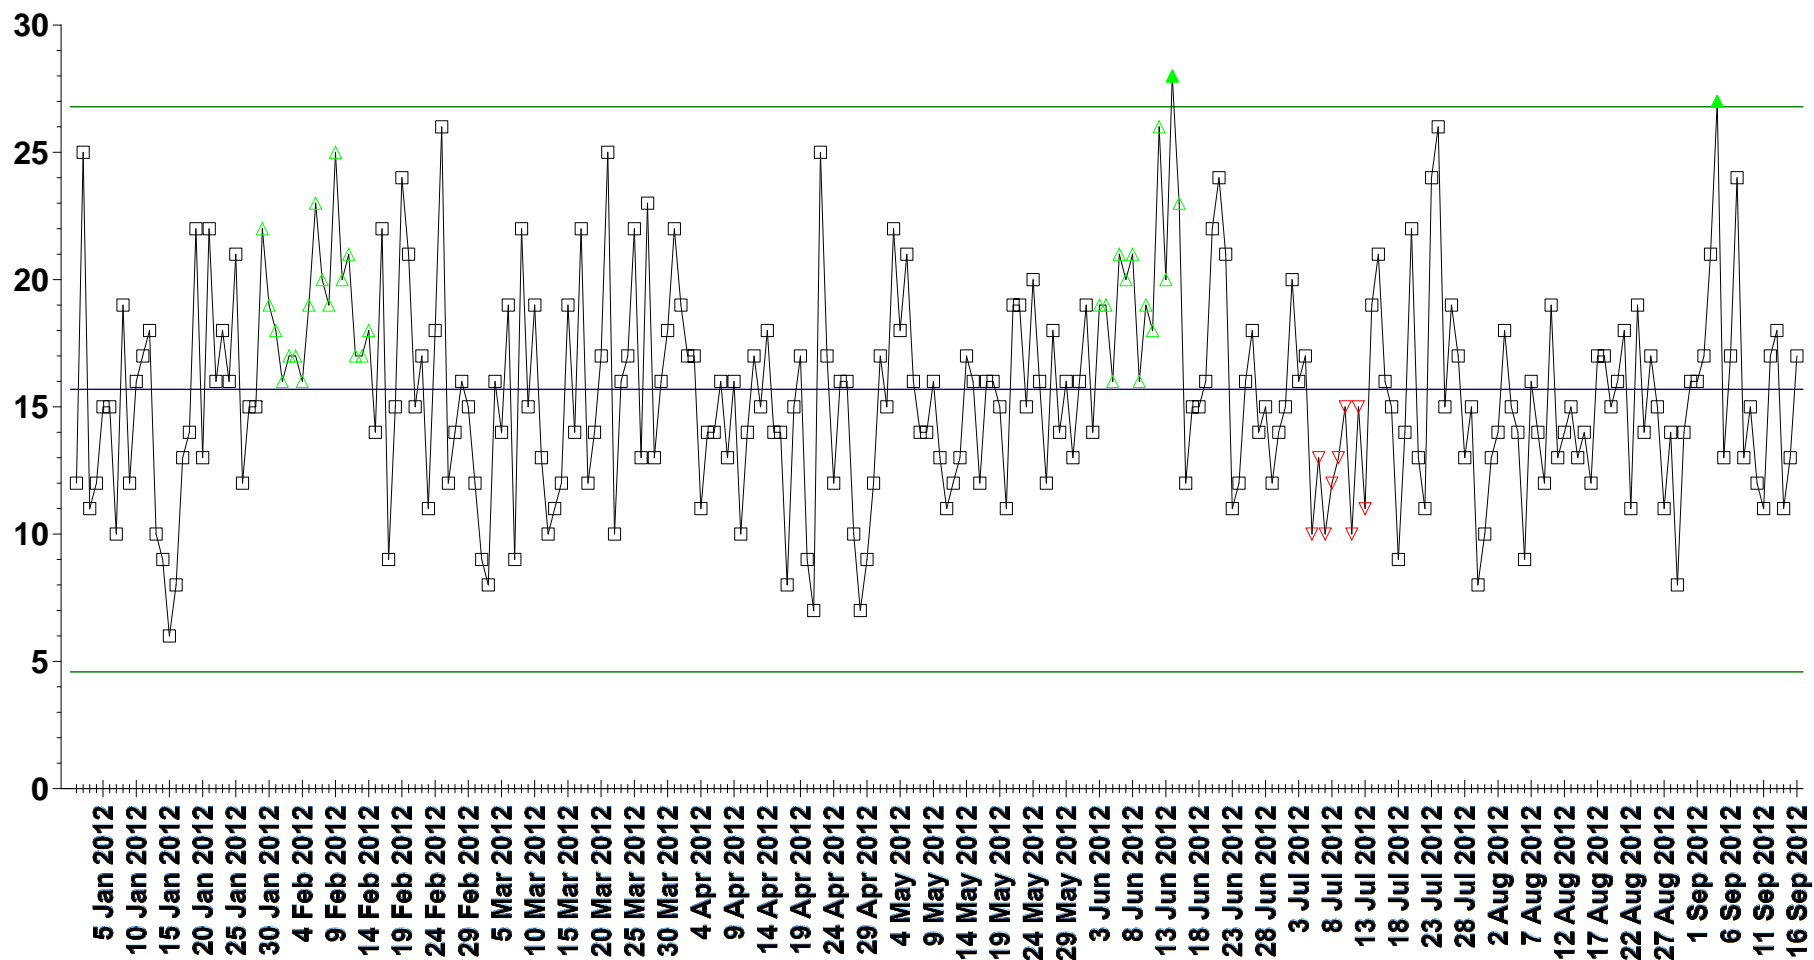

**Start** 1 Jan 2012  
**U.C.L.** =26.8  
**Mean** =15.7  
**L.C.L.** =4.6

Supplement: aft170_Supplementary_Data.zip [file aft170_Supplementary_Data.zip › aft170supp_fig8.pdf]

## NGH New AE Attends 65-84 yr old group

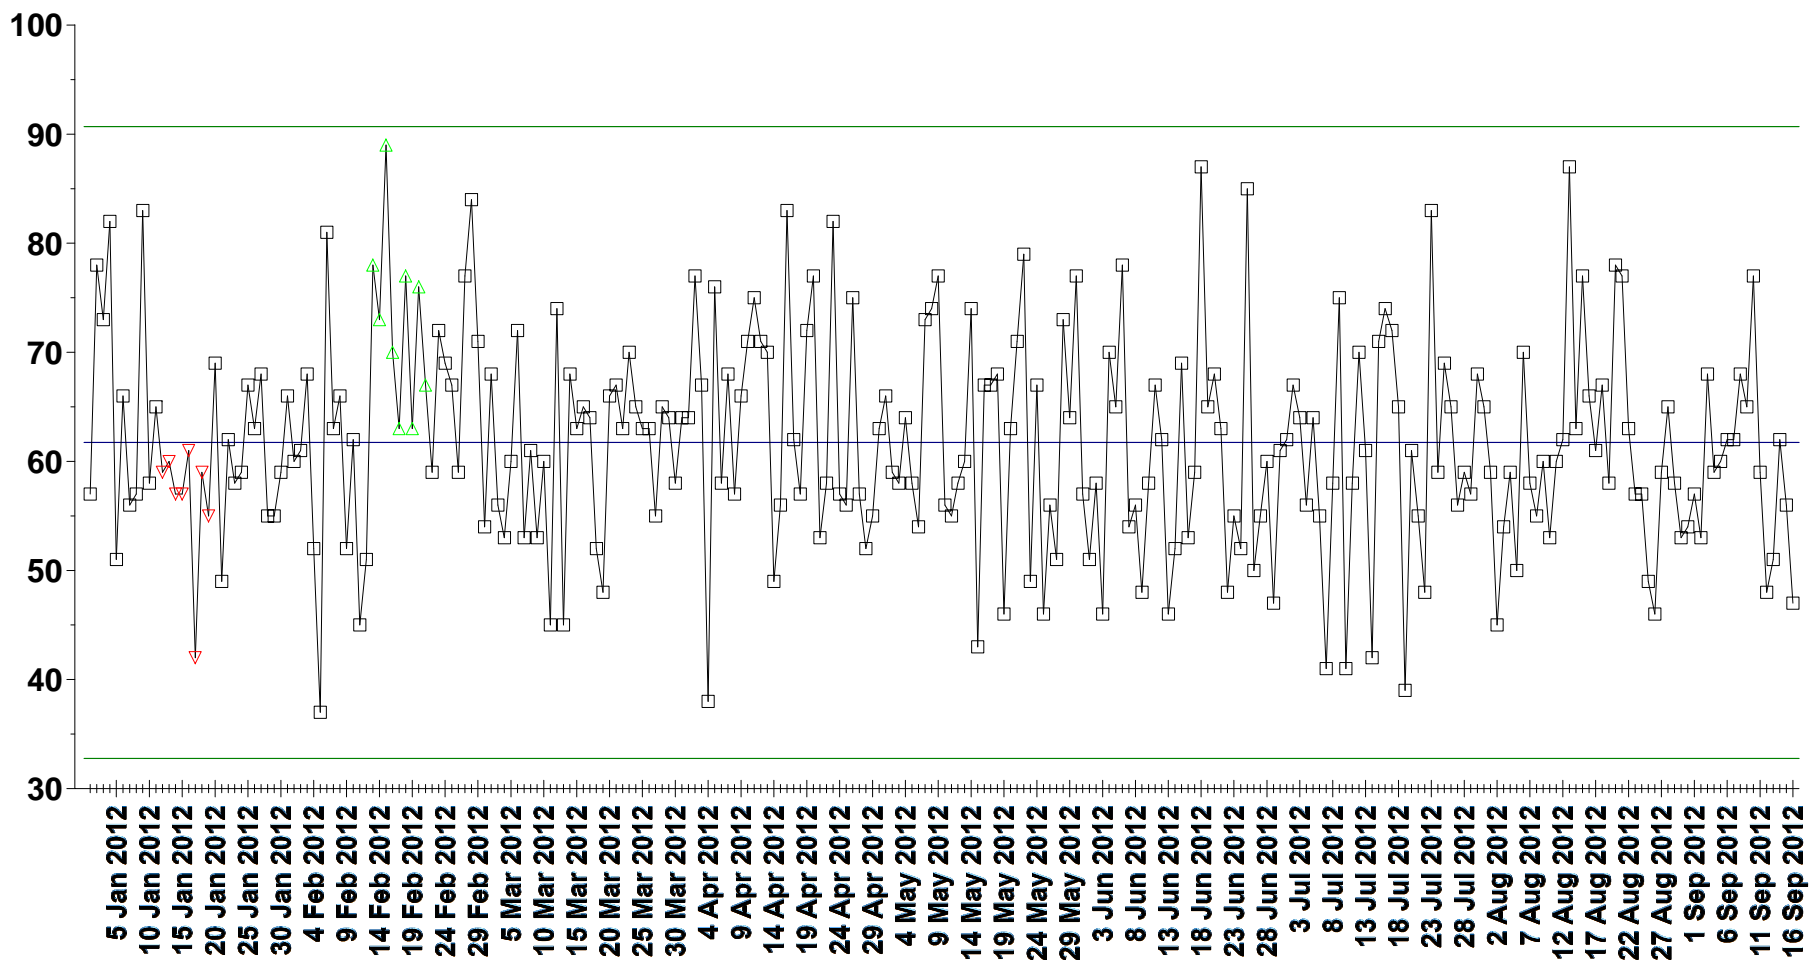

**Start**      1 Jan 2012  
**U.C.L.**     =90.7  
**Mean**      =61.7  
**L.C.L.**     =32.8

Supplement: aft170_Supplementary_Data.zip [file aft170_Supplementary_Data.zip › aft170supp_fig9aii.pdf]

## Midnight Bed Occupancy GSM NEL Admissions

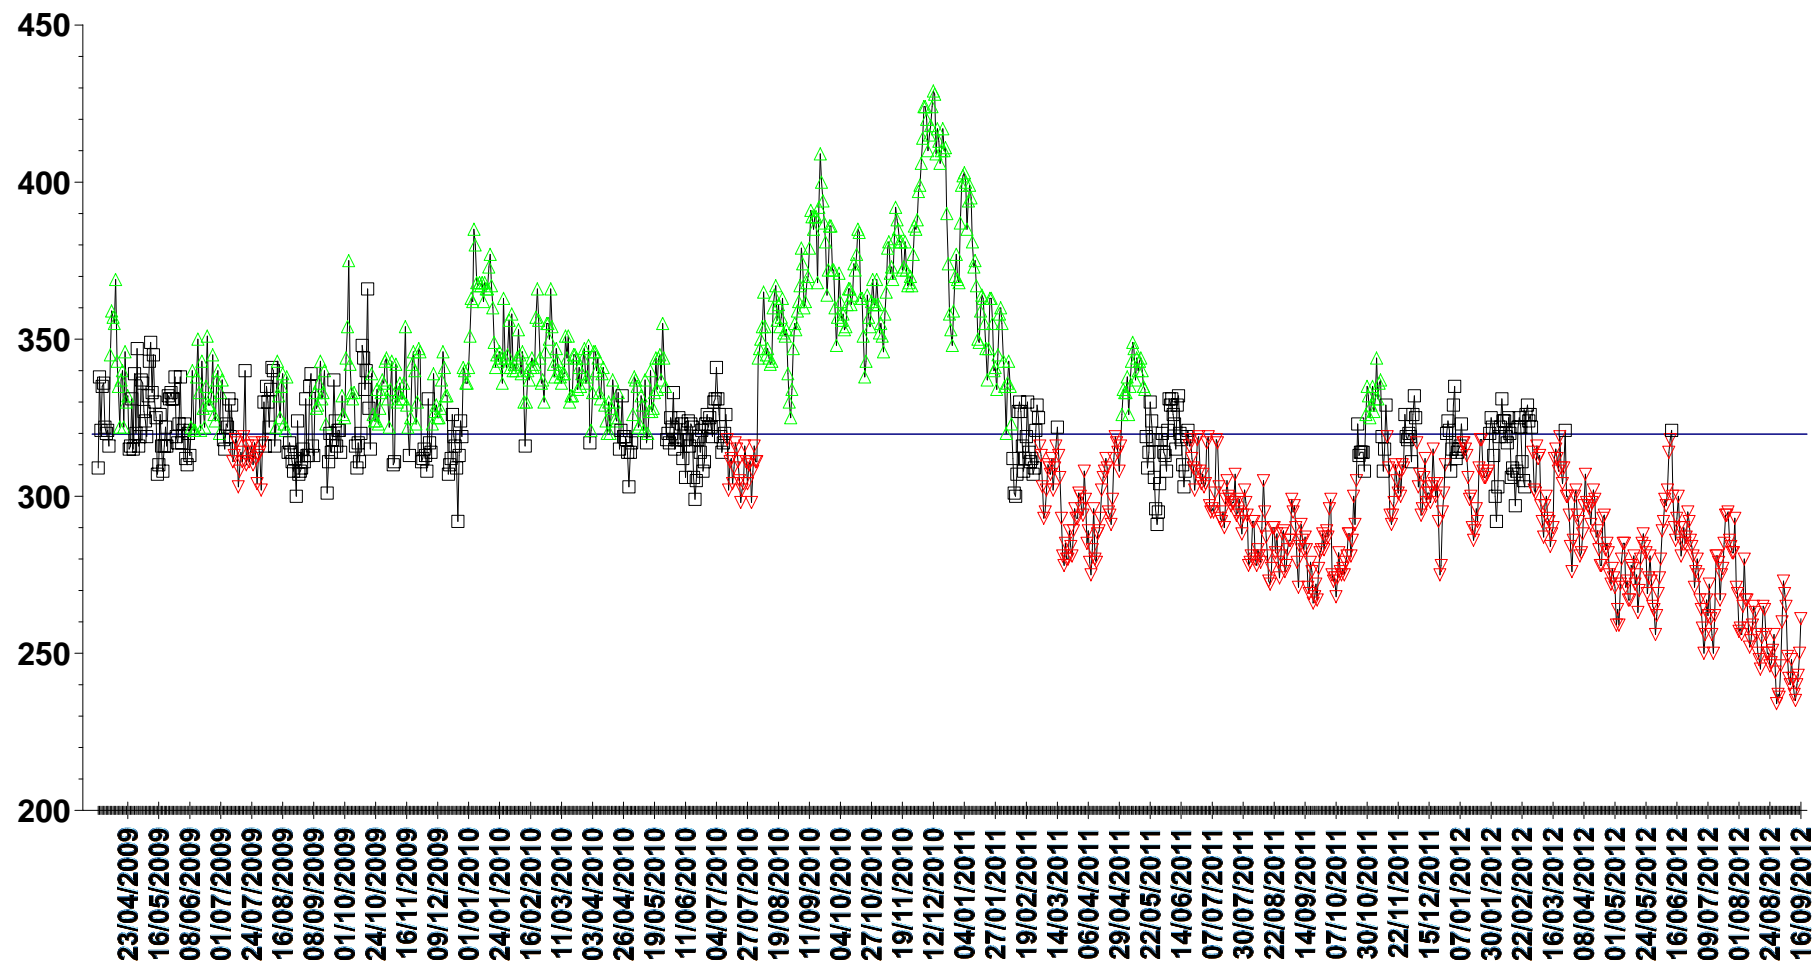

Start 01/04/2009

Mean =319.7

Supplement: aft170_Supplementary_Data.zip [file aft170_Supplementary_Data.zip › aft170supp_fig4.pdf]

## Midnight Bed Occupancy GSM NEL Admissions

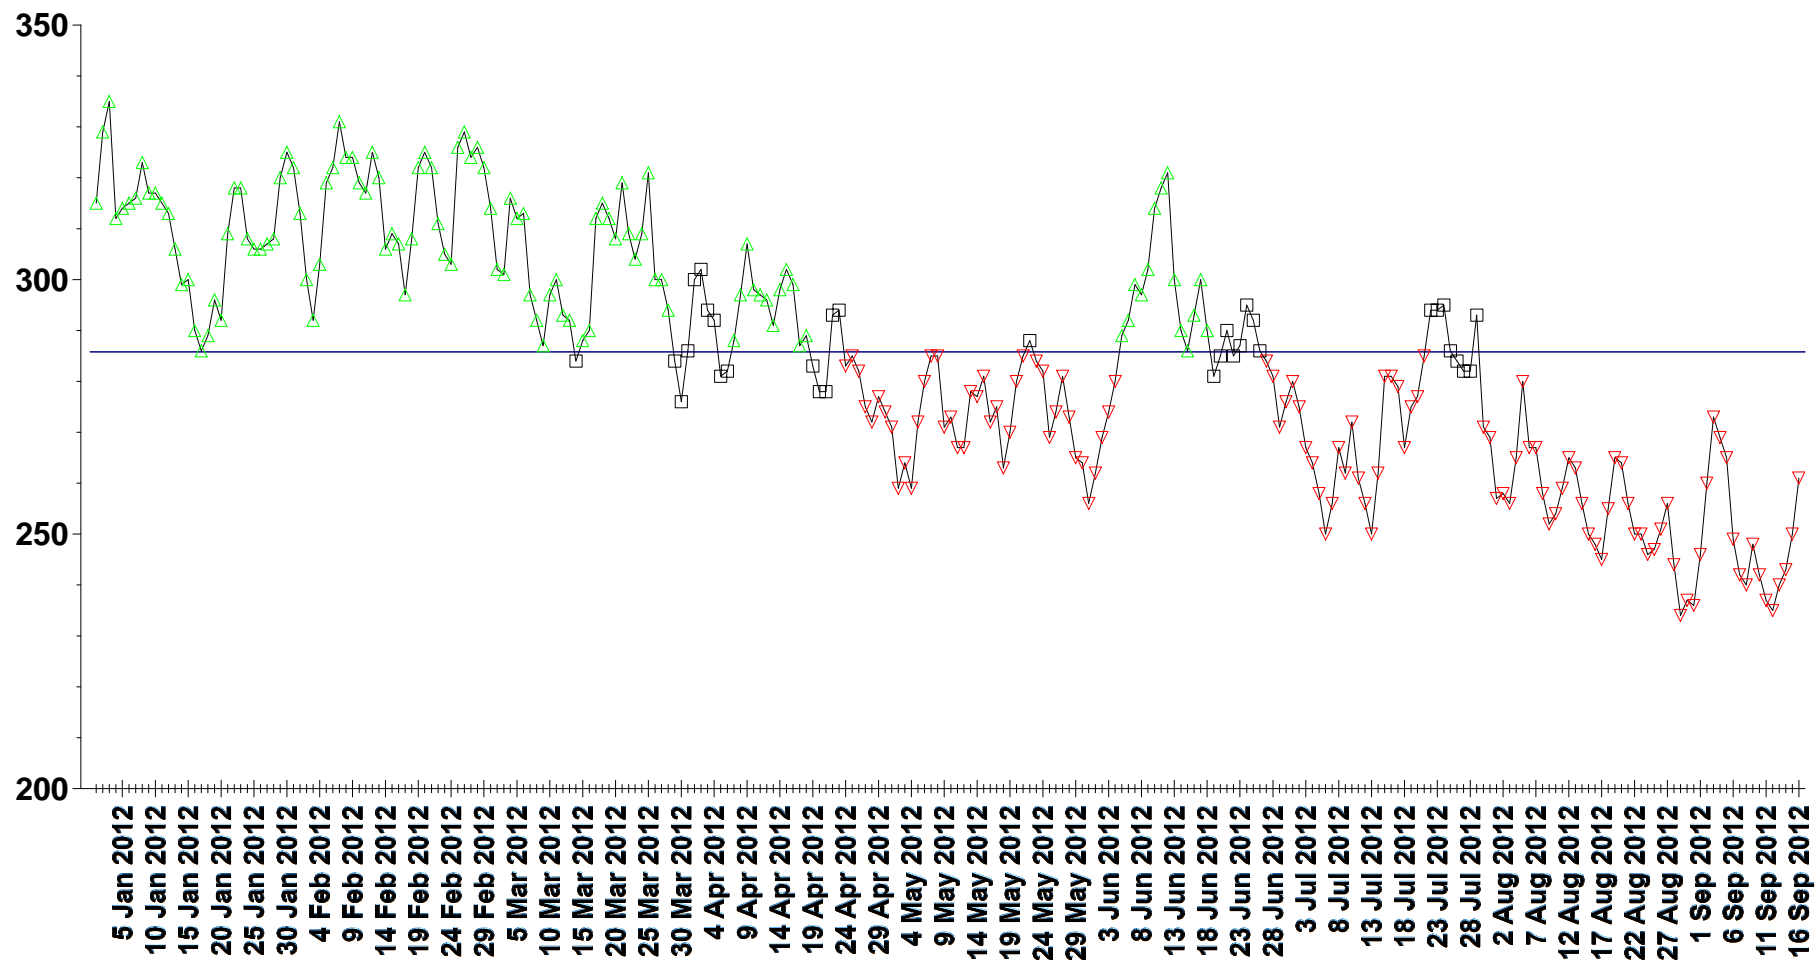

Start 1 Jan 2012

Mean =285.8

Supplement: aft170_Supplementary_Data.zip [file aft170_Supplementary_Data.zip › aft170supp_fig9bi.pdf]

## NGH New AE Attends 16-64 yr old group

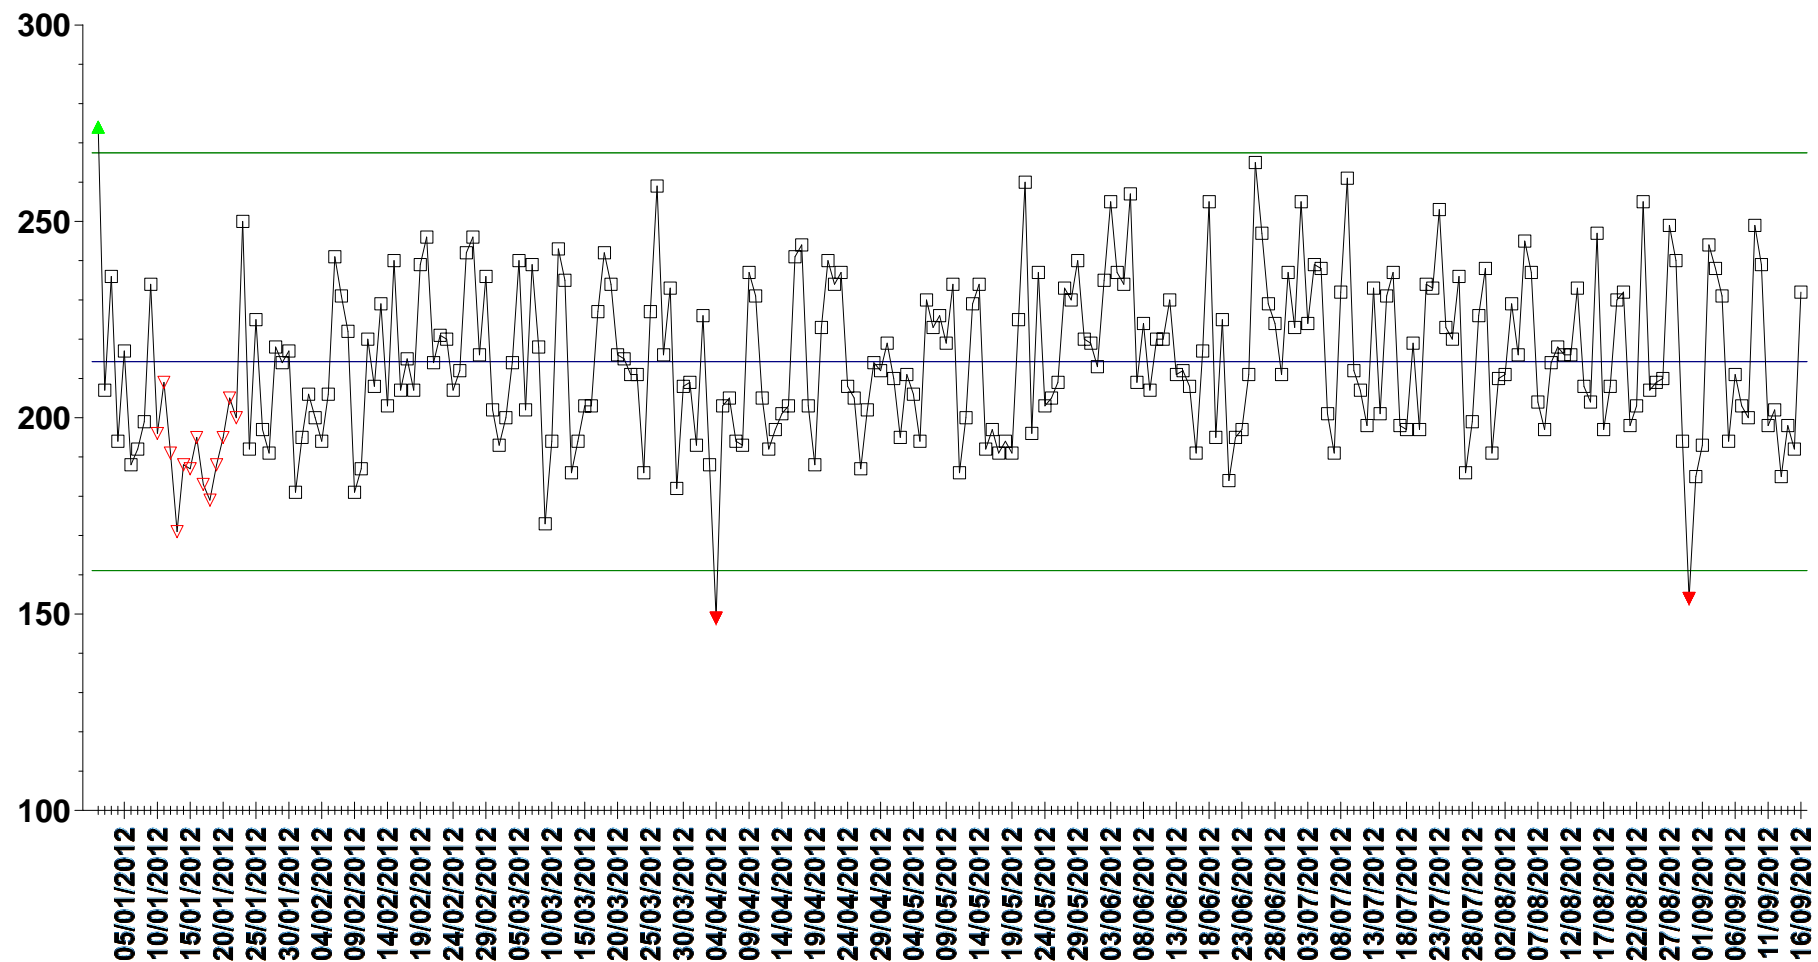

**Start**      01/01/2012  
**U.C.L.**     =267.5  
**Mean**       =214.2  
**L.C.L.**       =161.1

Supplement: aft170_Supplementary_Data.zip [file aft170_Supplementary_Data.zip › aft170supp_fig9ai.pdf]

## NEL Admissions All Specialties 85+ yr old group

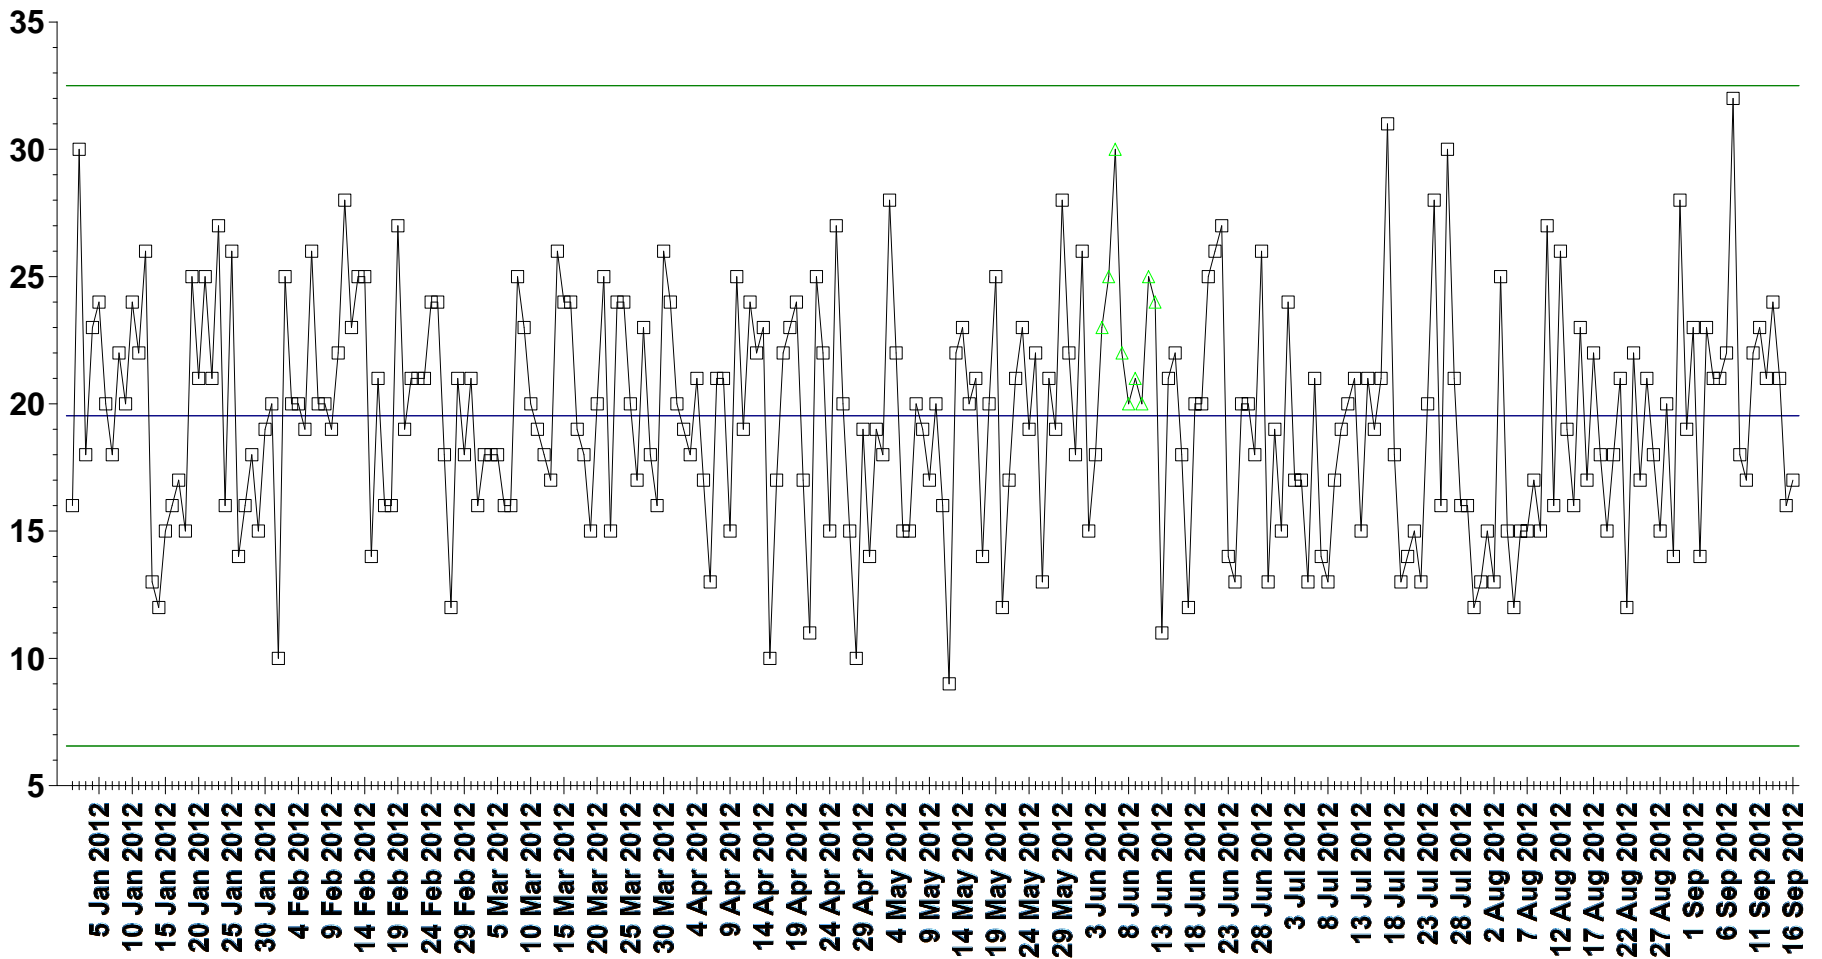

**Start**        1 Jan 2012  
**U.C.L.**      =32.5  
**Mean**        =19.5  
**L.C.L.**      =6.6

Supplement: aft170_Supplementary_Data.zip [file aft170_Supplementary_Data.zip › aft170supp_fig9avi.pdf]

## Readmissions to GSM (from any specialty)

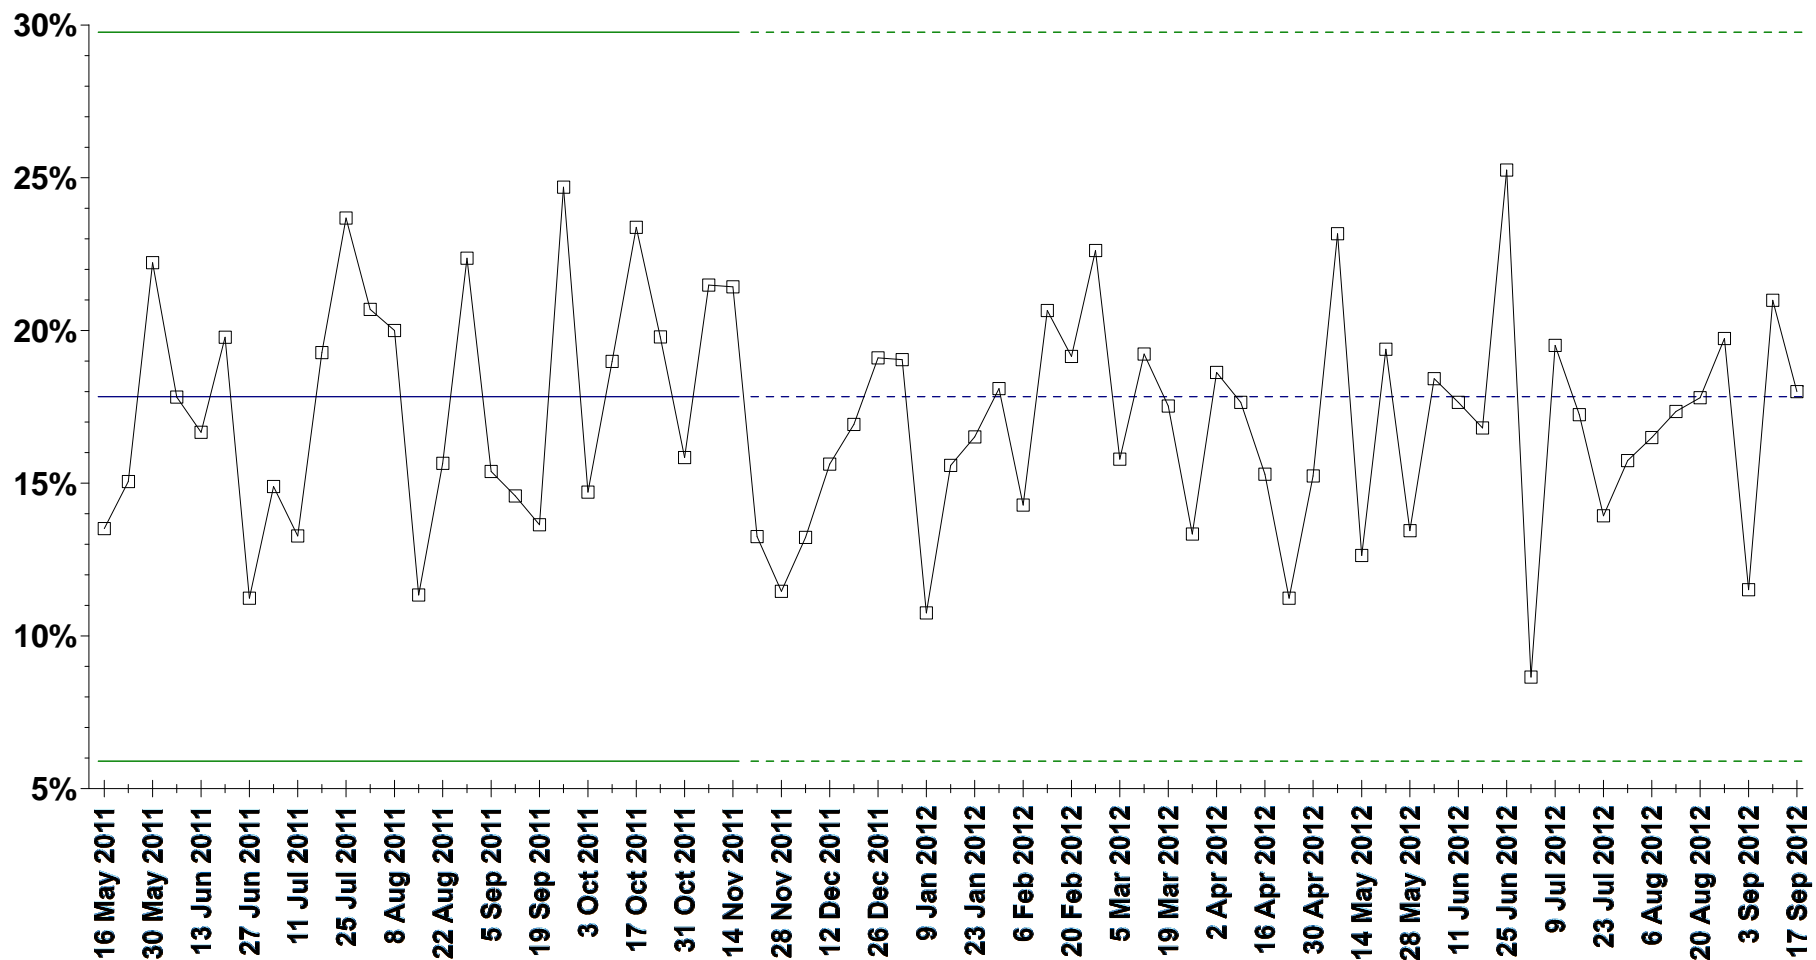

**Split Start**     16 May 2011     21 Nov 2011  
**U.C.L.**            =29.8%  
**Mean**             =17.8%            (Extra)  
**L.C.L.**            =5.9%

Supplement: aft170_Supplementary_Data.zip [file aft170_Supplementary_Data.zip › aft170supp_fig6.pdf]
